# Supplementary material for: Electrodeposited CuSbTe thin films with enhanced thermoelectric performance
Source: Royal Society of Chemistry journal article supplement (doi:10.1039/d3se00548h), 2023-01-01
Supplement: d3se00548h1.pdf [file d3se00548h1.pdf]

## Supplementary Information

### **Electrodeposited CuSbTe Thin Films with Enhanced Thermoelectric Performance**

**Amit Tanwar, Rajvinder Kaur, N. Padmanathan\*, and Kafil M. Razeeb\***

*Micro-Nano Systems Centre, Tyndall National Institute, University College Cork, Dyke Parade, Lee Maltings, Cork T12 R5CP, Ireland*

\*Authors to whom correspondence should be addressed: [kafil.mahmood@tyndall.ie](mailto:kafil.mahmood@tyndall.ie);  
[padman.narayanasamy@tyndall.ie](mailto:padman.narayanasamy@tyndall.ie)

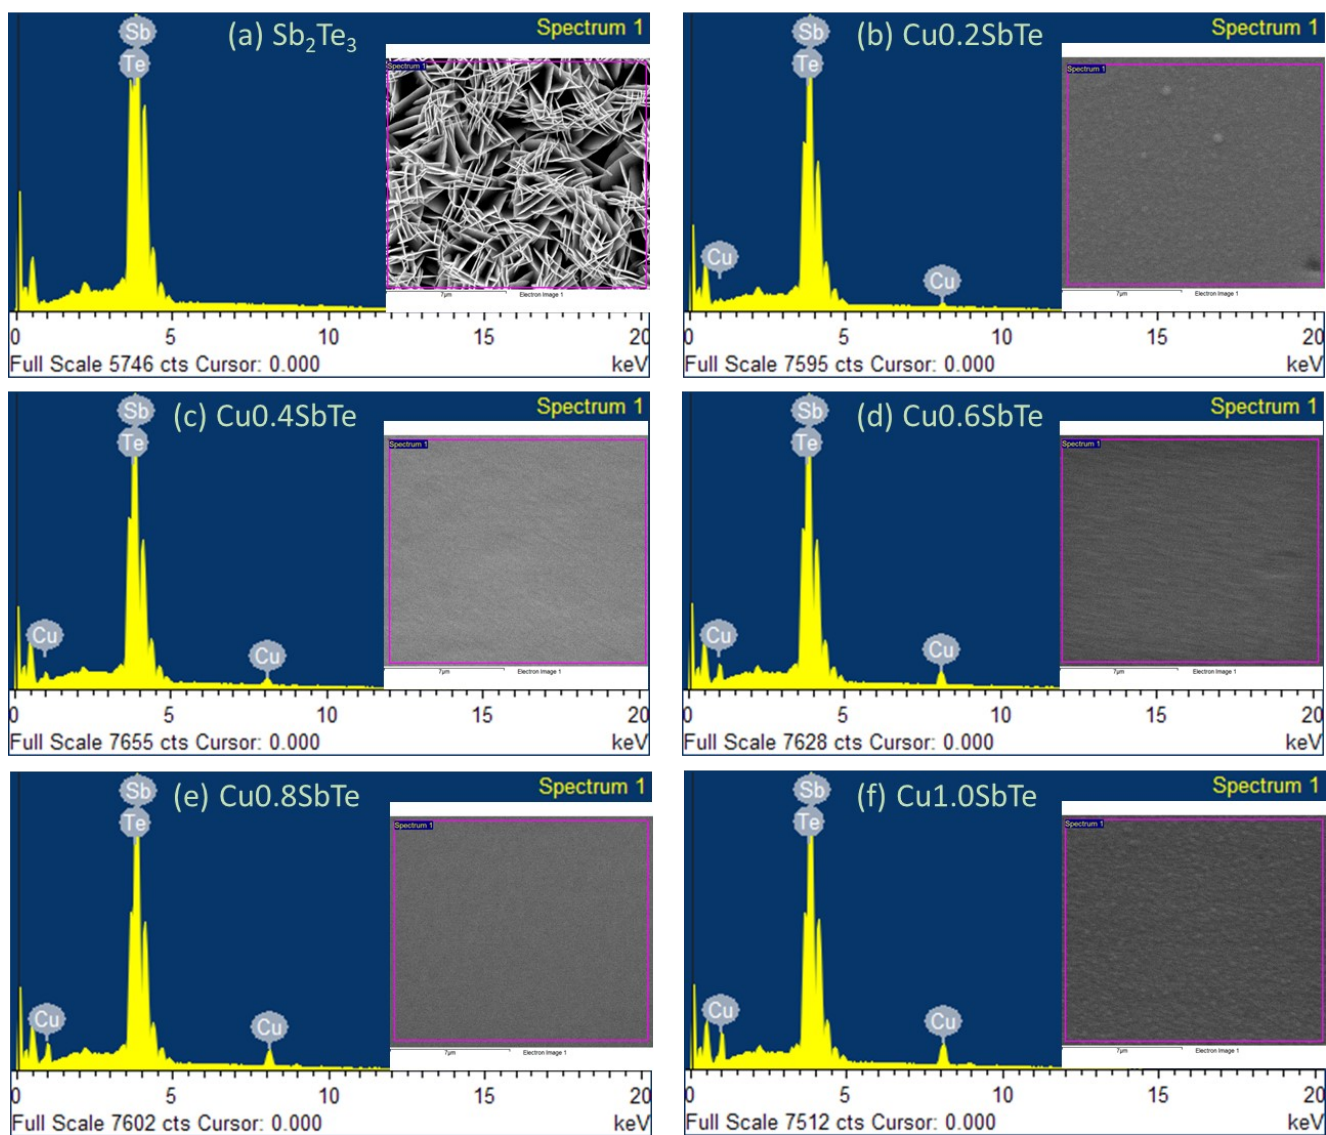

**Figure S1.** EDX spectra of (a)  $\text{Sb}_2\text{Te}_3$ , (b)  $\text{Cu}_{0.2}\text{SbTe}$ , (c)  $\text{Cu}_{0.4}\text{SbTe}$ , (d)  $\text{Cu}_{0.6}\text{SbTe}$ , (e)  $\text{Cu}_{0.8}\text{SbTe}$ , (f)  $\text{Cu}_{1.0}\text{SbTe}$ .

**Table S1.** The average film thickness and elemental composition of Sb<sub>2</sub>Te<sub>3</sub> and CuSbTe films.

| Bath                            | Average Film thickness (μm) | Cu (at%)     | Sb (at%)     | Te (at%)     |
|---------------------------------|-----------------------------|--------------|--------------|--------------|
| Sb <sub>2</sub> Te <sub>3</sub> | 8.99                        | 0            | 36.95        | 63.05        |
|                                 |                             | 0            | 37.20        | 62.80        |
|                                 |                             | 0            | 36.95        | 63.05        |
|                                 |                             | 0            | 36.84        | 63.16        |
|                                 |                             | 0            | 36.23        | 63.77        |
|                                 |                             | <b>0</b>     | <b>36.83</b> | <b>63.17</b> |
| Cu <sub>0.2</sub> SbTe          | 5.80                        | 3.05         | 34.86        | 62.09        |
|                                 |                             | 2.71         | 35.23        | 62.06        |
|                                 |                             | 2.75         | 35.28        | 61.96        |
|                                 |                             | 2.84         | 35.06        | 62.10        |
|                                 |                             | 2.91         | 35.05        | 62.03        |
|                                 |                             | <b>2.85</b>  | <b>35.10</b> | <b>62.05</b> |
| Cu <sub>0.4</sub> SbTe          | 5.49                        | 5.65         | 33.82        | 60.53        |
|                                 |                             | 5.62         | 33.69        | 60.69        |
|                                 |                             | 5.85         | 33.55        | 60.60        |
|                                 |                             | 5.76         | 33.73        | 60.51        |
|                                 |                             | 5.56         | 33.81        | 60.63        |
|                                 |                             | <b>5.69</b>  | <b>33.72</b> | <b>60.59</b> |
| Cu <sub>0.6</sub> SbTe          | 4.86                        | 10.34        | 30.68        | 58.98        |
|                                 |                             | 9.49         | 31.48        | 59.02        |
|                                 |                             | 9.84         | 30.92        | 59.24        |
|                                 |                             | 10.38        | 31.31        | 58.31        |
|                                 |                             | 10.27        | 30.52        | 59.21        |
|                                 |                             | <b>10.06</b> | <b>30.98</b> | <b>58.96</b> |
| Cu <sub>0.8</sub> SbTe          | 4.56                        | 11.76        | 30.66        | 57.58        |
|                                 |                             | 11.31        | 30.60        | 58.08        |
|                                 |                             | 11.32        | 30.54        | 58.14        |
|                                 |                             | 11.70        | 30.34        | 57.96        |
|                                 |                             | 11.86        | 30.34        | 57.80        |
|                                 |                             | <b>11.59</b> | <b>30.50</b> | <b>57.91</b> |
| Cu <sub>1.0</sub> SbTe          | 4.35                        | 15.27        | 28.79        | 55.94        |
|                                 |                             | 15.32        | 28.49        | 56.18        |
|                                 |                             | 15.63        | 28.59        | 55.78        |
|                                 |                             | 15.34        | 28.41        | 56.25        |
|                                 |                             | 15.93        | 28.07        | 56.00        |
|                                 |                             | <b>15.50</b> | <b>28.47</b> | <b>56.03</b> |

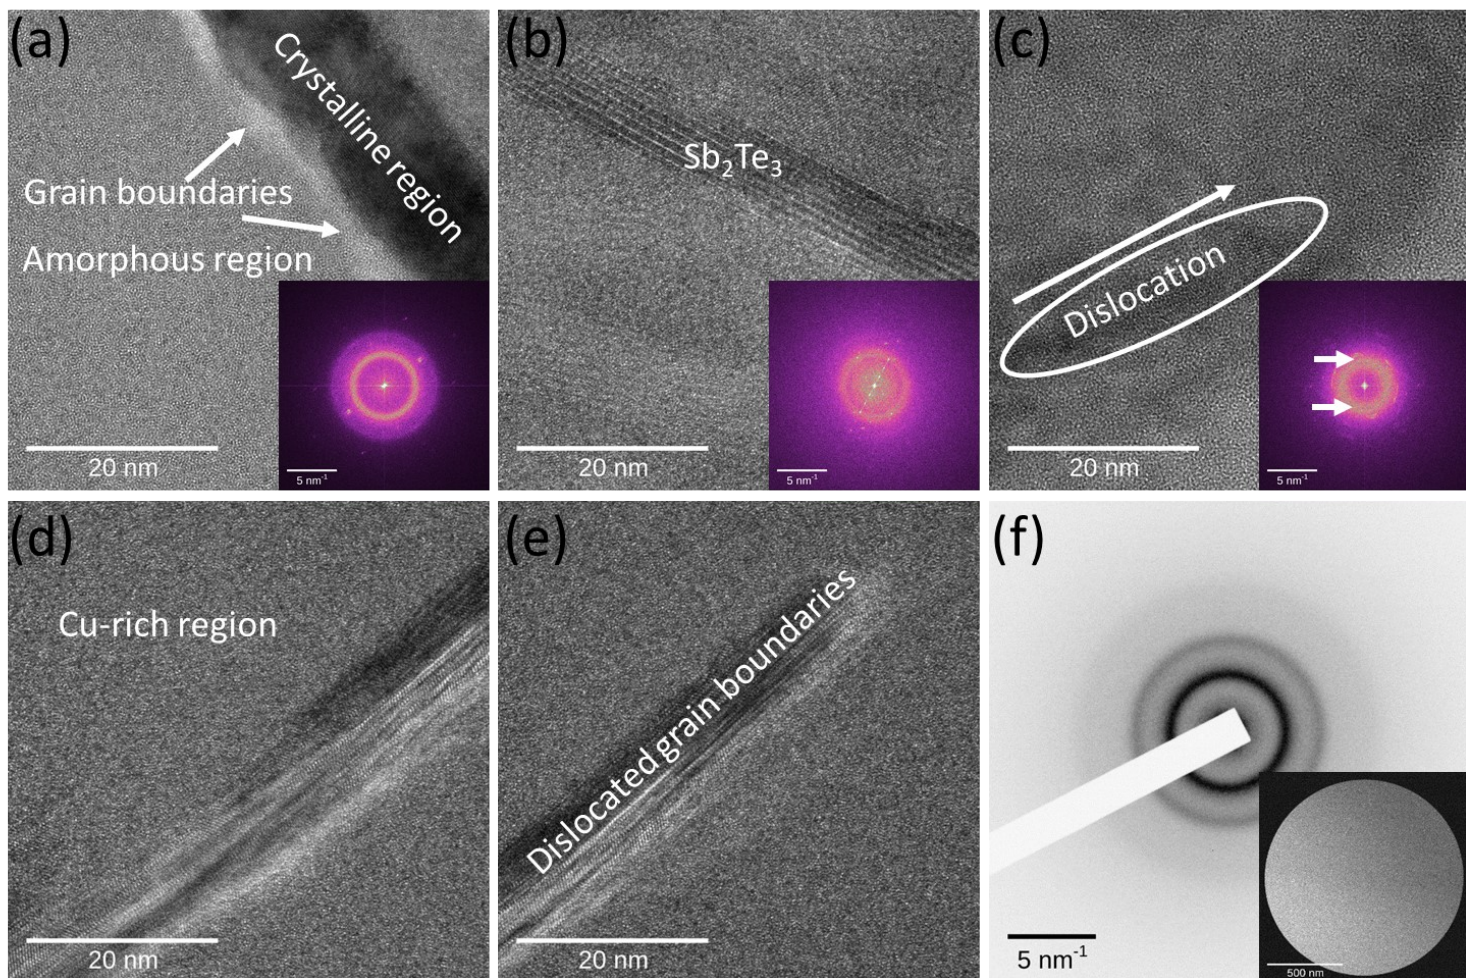

**Figure S2.** (a) HRTEM image Cu<sub>0.4</sub>SbTe film showing crystalline and amorphous region, (b) Distribution of amorphous and crystalline fraction of CuSbTe, (c) Dislocation in CuSbTe film, (d and e) Amorphous-crystalline features with dislocations at grain boundaries (f) SAED pattern of Cu<sub>0.4</sub>SbTe in spotted region of the inset.

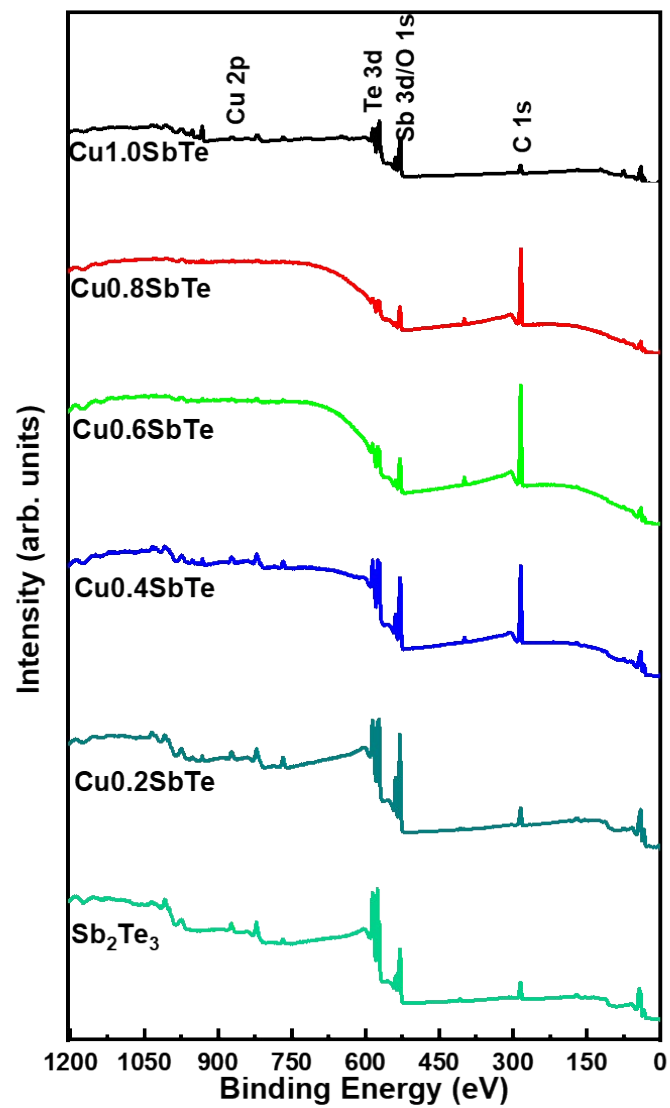

Figure S3. XPS survey spectra of pure Sb<sub>2</sub>Te<sub>3</sub> and CuSbTe films.



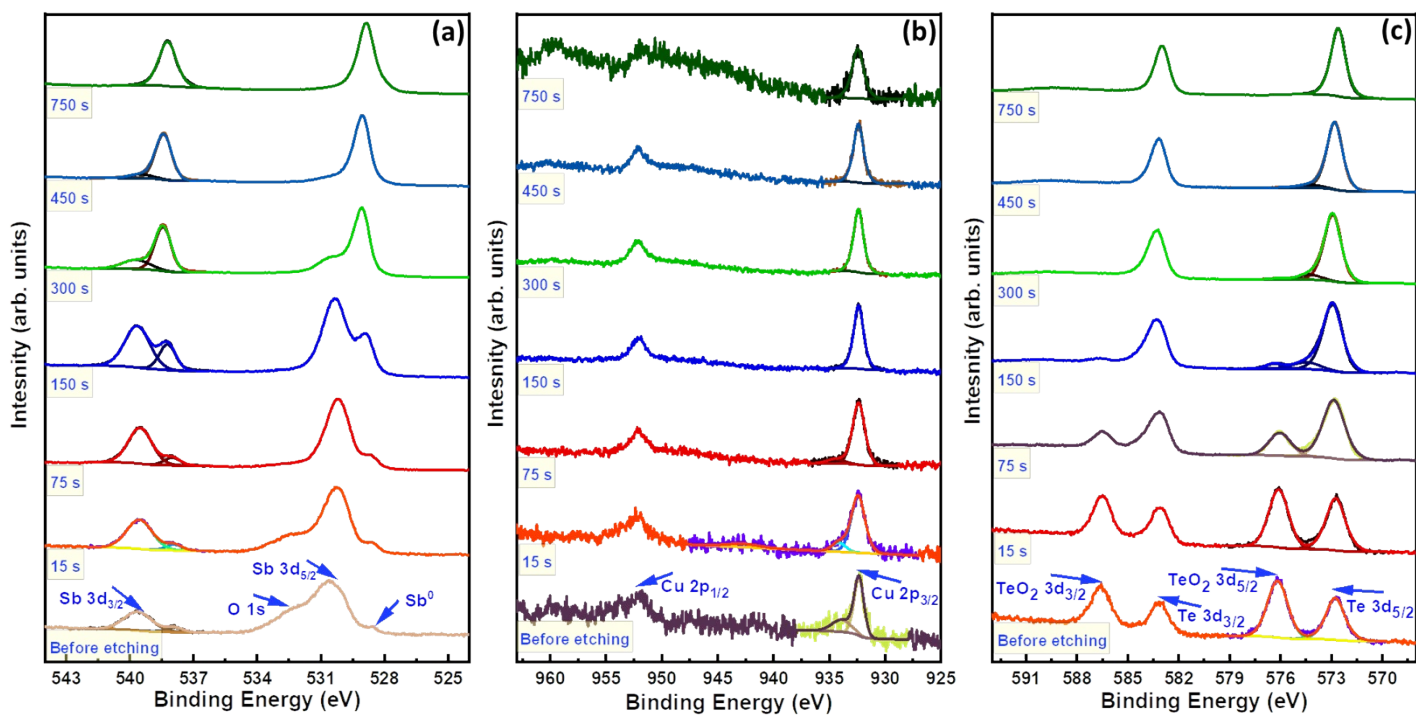

**Figure S4.** The core level XPS signals of (a) Sb 3d, (b) Cu2p, (c) and Te 3d for Cu<sub>0.4</sub>SbTe film for different etching time.
